# Supplementary material for: Case Study of Diesters of o-Phthalic Acid in Surface Waters with Background Levels of Pollution
Source: MDPI journal article supplement (doi:10.3390/toxics11100869), 2023-10-19
Supplement: s1 [file s1]

**Table S1.** Average values concentrations for different groups PAEs monitoring results in Lake Baikal waters (confidence intervals, P=0.95). The confidence intervals are calculated using boot strap method

| Data groups                           | PAEs, µg/L               |                          |                          |                          |
|---------------------------------------|--------------------------|--------------------------|--------------------------|--------------------------|
|                                       | DMP                      | DEP                      | DBP                      | DEHP                     |
| Lake Baikal waters                    | 0.016<br>(0.015 0.020)   | 0.073<br>(0.063 0.087)   | 0.548<br>(0.474 0.662)   | 0.296<br>(0.261 0.338)   |
| <i>Seasons</i>                        |                          |                          |                          |                          |
| Spring                                | 0.015<br>(0.012 0.020)   | 0.075<br>(0.061 0.094)   | 0.712<br>(0.597 0.893)   | 0.383<br>(0.337 0.452)   |
| Autumn                                | 0.018<br>(0.015 0.0223)  | 0.071<br>(0.057 0.092)   | 0.311<br>(0.251 0.410)   | 0.169<br>(0.141 0.210)   |
| <i>Basins</i>                         |                          |                          |                          |                          |
| Southern                              | 0.02<br>(0.0157 0.0266)  | 0.0726<br>(0.0603 0.088) | 0.493<br>(0.41 0.586)    | 0.271<br>(0.233 0.322)   |
| Central                               | 0.012<br>(0.009 0.015)   | 0.062<br>(0.047 0.088)   | 0.688<br>(0.506 1.15)    | 0.311<br>(0.250 0.405)   |
| Northern                              | 0.014<br>(0.011 0.018)   | 0.0835<br>(0.060 0.118)  | 0.521<br>(0.396 0.765)   | 0.322<br>(0.251 0.418)   |
| <i>Year</i>                           |                          |                          |                          |                          |
| 2015                                  | -                        | -                        | 0.288<br>(0.215 – 0.429) | 0.809<br>(0.577 – 1.12)  |
| 2016                                  | -                        | -                        | 0.636<br>(0.511 – 0.792) | 0.231<br>(0.165 – 0.35)  |
| 2017                                  | 0.013<br>(0.009 – 0.016) | 0.145<br>(0.116 – 0.185) | 1.24<br>(0.944 – 1.86)   | 0.377<br>(0.302 – 0.474) |
| 2018                                  | 0.001<br>(0.001 – 0.003) | 0.056<br>(0.048 – 0.068) | 0.719<br>(0.563 – 0.889) | 0.529<br>(0.376 – 0.842) |
| 2019                                  | 0.006<br>(0.004 – 0.009) | 0.067<br>(0.044 – 0.113) | 0.181<br>(0.129 – 0.298) | 0.240<br>(0.179 0.36)    |
| 2020                                  | 0.003<br>(0.002 – 0.005) | 0.038<br>(0.030 – 0.046) | 0.787<br>(0.542 – 1.17)  | 0.238<br>(0.166 – 0.356) |
| 2021                                  | 0.025<br>(0.019 – 0.031) | 0.093<br>(0.071 – 0.124) | 0.195<br>(0.139 – 0.262) | 0.239<br>(0.182 – 0.341) |
| 2022                                  | 0.031<br>(0.025 – 0.046) | 0.018<br>(0.013 – 0.024) | 0.284<br>(0.162 – 0.518) | 0.187<br>(0.151 – 0.243) |
| <i>Ecotope</i>                        |                          |                          |                          |                          |
| Bays                                  | 0.014<br>(0.001 – 0.022) | 0.054<br>(0.030 – 0.123) | 0.591<br>(0.350 – 1.14)  | 0.311<br>(0.195 – 0.498) |
| Central zone                          | 0.013<br>(0.010 – 0.018) | 0.086<br>(0.068 – 0.110) | 0.776<br>(0.628 – 1.07)  | 0.355<br>(0.303 – 0.421) |
| Near-shore zone                       | 0.019<br>(0.015 – 0.026) | 0.064<br>(0.051 – 0.083) | 0.406<br>(0.333 – 0.512) | 0.240<br>(0.196 – 0.304) |
| Rivers                                | 0.017<br>(0.011 – 0.024) | 0.079<br>(0.055 – 0.111) | 0.367<br>(0.250 – 0.518) | 0.326<br>(0.245 – 0.476) |
| <i>Central zone – miscellaneous</i>   |                          |                          |                          |                          |
| Central zone                          | 0.013<br>(0.009 – 0.019) | 0.086<br>(0.070 – 0.110) | 0.776<br>(0.627 – 1.09)  | 0.355<br>(0.299 0.421)   |
| Bays, near-shore zone, rivers mouthes | 0.018<br>(0.015 – 0.023) | 0.066<br>(0.054 – 0.083) | 0.422<br>(0.355 – 0.524) | 0.263<br>(0.223 – 0.309) |

**Table S2.** Assessment of the environmental risk (RQ) for hydrobionts by average concentrations of priority congeners PAEs<sup>1</sup>

| PAEs | Hydrobiont | Species                         | PNEC,<br>μg/L | C average <sup>2</sup> ,<br>μg/L | RQ     |
|------|------------|---------------------------------|---------------|----------------------------------|--------|
| DMP  | Algae      | Pseudokirchneriella subcapitata | 142           | 0.02                             | 0.0001 |
|      | Cladoceran | Daphnia magna                   | 33            |                                  | 0.0005 |
|      | Fish       | Lepomis macrochirus             | 50            |                                  | 0.0003 |
| DEP  | Algae      | Pseudokirchneriella subcapitata | 16            | 0.07                             | 0.0046 |
|      | Cladoceran | Daphnia magna                   | 86            |                                  | 0.0008 |
|      | Fish       | Lepomis macrochirus             | 16.5          |                                  | 0.0044 |
| DnBP | Algae      | Pseudokirchneriella subcapitata | 142           | 0.55                             | 0.0039 |
|      | Cladoceran | Daphnia magna                   | 33            |                                  | 0.017  |
|      | Fish       | Danio rerio (Zebra danio)       | 10            |                                  | 0.055  |
| DEHP | Algae      | Pseudokirchneriella subcapitata | 0.1           | 0.30                             | 2.96   |
|      | Cladoceran | Daphnia magna                   | 0.77          |                                  | 0.384  |
|      | Fish       | Lepomis macrochirus             | 6.0           |                                  | 0.049  |

Note: <sup>1</sup> – average concentrations of priority PAEs in Lake Baikal waters for monitoring period of 2015-2022; <sup>2</sup> –PNEC – the concentration that is not expected to affect aquatic organisms, data from [24,25].

Criteria of the assessment of PAEs risk: RQ <0.01 – no risk or a very low level of risk; RQ = 0.01-1.0 – average level of risk; RQ > 1.0 – high level of risk.

**Table S3.** Assessment of ecological risk (RQ) with increasing concentrations of dominant congeners of PAEs (C, µg/l) in the water of the lake Baikal and at the mouths of the tributaries of the lake

| PAEs | Pelagic zone |       |            |       | Under the ice,<br>5 m |       | Deep<br>horizons,<br>1500-1600 m |       | Selenga<br>shallow water |       | Tributaries in spring |       |            |       | Near-shore zone |       |            |       |
|------|--------------|-------|------------|-------|-----------------------|-------|----------------------------------|-------|--------------------------|-------|-----------------------|-------|------------|-------|-----------------|-------|------------|-------|
|      | St., No 6    |       | St., No 11 |       | St., No 3             |       | St., No 10                       |       | St., No 24               |       | St., No 32            |       | St., No 22 |       | St., No 28      |       | St., No 29 |       |
|      | C            | RQ    | C          | RQ    | C                     | RQ    | C                                | RQ    | C                        | C     | C                     | RQ    | C          | RQ    | C               | RQ    | C          | RQ    |
| DnBP | 2.5          | 0.018 | 1.4        | 0.010 | 0.13                  | 0.001 | 3.7                              | 0.026 | 11                       | 0,081 | 0.04                  | 0.000 | 0.08       | 0.001 | 1.3             | 0.009 | 8.1        | 0.057 |
|      | 2.5          | 0.077 | 1.4        | 0.042 | 0.13                  | 0.004 | 3.7                              | 0.112 | 11                       | 0,348 | 0.04                  | 0.001 | 0.08       | 0.002 | 1.3             | 0.039 | 8.1        | 0.245 |
|      | 2.5          | 0.253 | 1.4        | 0.140 | 0.13                  | 0.013 | 3.7                              | 0.370 | 11                       | 1.2   | 0.04                  | 0.004 | 0.08       | 0.008 | 1.3             | 0.130 | 8.1        | 0.810 |
| DEHP | 0.38         | 3.8   | 2.2        | 22    | 5.8                   | 58    | 1.2                              | 12    | 0.70                     | 7.0   | 0.25                  | 2.5   | 0.34       | 3.4   | 0.24            | 2.4   | 0.70       | 7.0   |
|      | 0.38         | 0.494 | 2.2        | 2.9   | 5.8                   | 7.5   | 1.2                              | 1.6   | 0.70                     | 0.909 | 0.25                  | 0.325 | 0.34       | 0.442 | 0.24            | 0.312 | 0.07       | 0.909 |
|      | 0.38         | 0.063 | 2.2        | 0.367 | 5.8                   | 0.967 | 1.2                              | 0.200 | 0.70                     | 0.117 | 0.25                  | 0.042 | 0.34       | 0.057 | 0.24            | 0.040 | 0.70       | 0.117 |

Criteria of the assessment of PAEs risk: RQ <0.01 – no risk or a very low level of risk; RQ = 0.01-1.0 – average level of risk; RQ > 1.0 – high level; RQ >> 1.0 – high level.

Hydrobionts species and quantities values of PNEC (µg/L) are presented in the **Table S2**.
